# Supplementary material for: E3 Ubiquitin Ligase PUB23 in Kiwifruit Interacts with Trihelix Transcription Factor GT1 and Negatively Regulates Immune Responses against Pseudomonas syringae pv. actinidiae
Source: MDPI journal article supplement (doi:10.3390/ijms25031930), 2024-02-05
Supplement: s1 [file s1]

Table S1. list of primers used in this article

| <b>Gene name</b> | <b>Forward primer (5'-&gt;3')</b> | <b>Reverse primer (5'-&gt;3')</b> |
|------------------|-----------------------------------|-----------------------------------|
| Actin            | TGCATGAGCGATCAAGTTTCAAG           | TGTCCCATGTCTGGTTGATGACT           |
| PR1              | GCCCCCGGTAAGGTTTGT                | CGAACCAAGACCCACTATTGC             |
| RIN4             | CTTTGAGAAAGCACGGAAGG              | TGTTCTTCTGGTTCGGTTC               |
| GT1              | AACGCCCAAACCAAACCCTA              | AAACCTCAGAATCGCCCTCG              |
| ICS1             | AGGCGAGGCTTCTAATTG                | ACAGCAAACCTCACTCTCTC              |
